# Supplementary material for: Thymic involution and rising disease incidence with age
Source: PubMed Central journal article supplement — Proc Natl Acad Sci U S A. 2018 Feb 5;115(8):1883–8. doi: 10.1073/pnas.1714478115 (PMC5828591; doi:10.1073/pnas.1714478115), 2018-02-05

**I. HEALTHY CELLS**

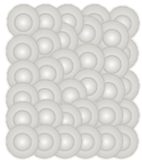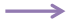

**II. GENERATION OF MALIGNANT CELLS**

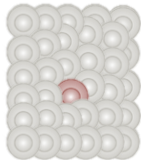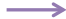

**III. EFFECTIVE IMMUNE RESPONSE**

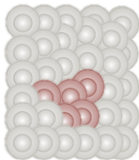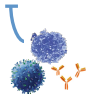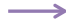

**IV. AGE-DEPENDENT IMMUNE ESCAPE THRESHOLD**

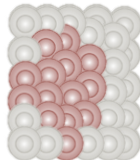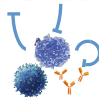

IMMUNOSUPPRESSIVE MICROENVIRONMENT

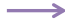

**V. CLINICAL DIAGNOSIS**

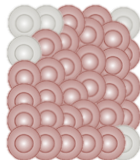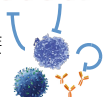

Supplement: pnas.1714478115.sfig03.pdf [file pnas.1714478115.sfig03.pdf]
