# Supplementary figures and images for: Thymic involution and rising disease incidence with age
Source: PubMed Central journal article supplement — Proc Natl Acad Sci U S A. 2018 Feb 5;115(8):1883–8. doi: 10.1073/pnas.1714478115 (PMC5828591; doi:10.1073/pnas.1714478115), 2018-02-05

# Thymus Volume

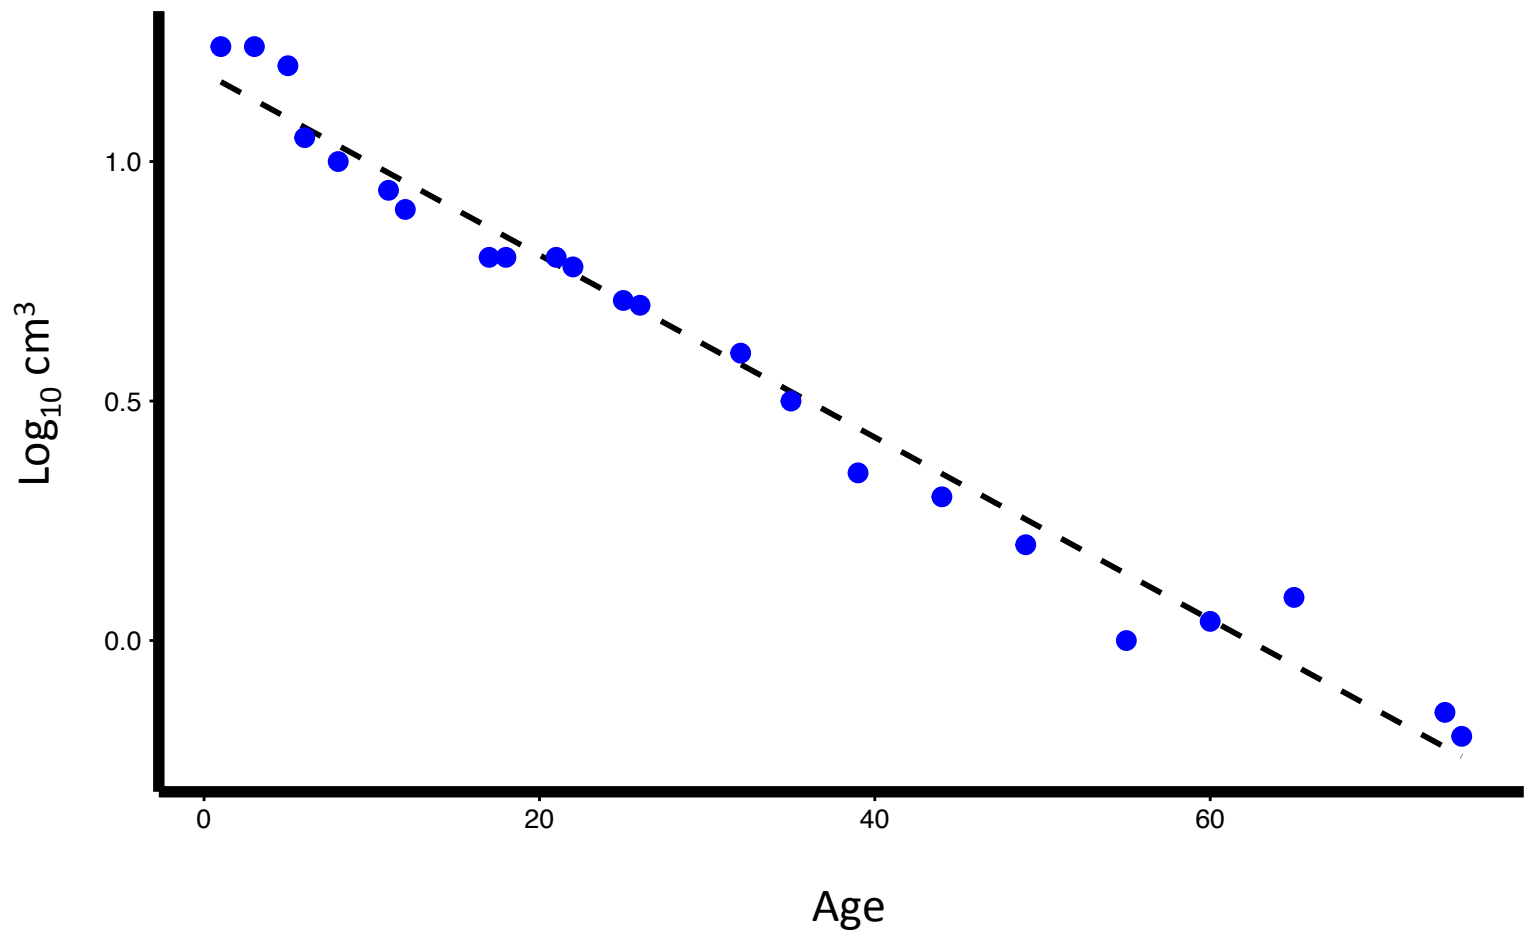

Supplement: pnas.1714478115.sfig01.pdf [file pnas.1714478115.sfig01.pdf]

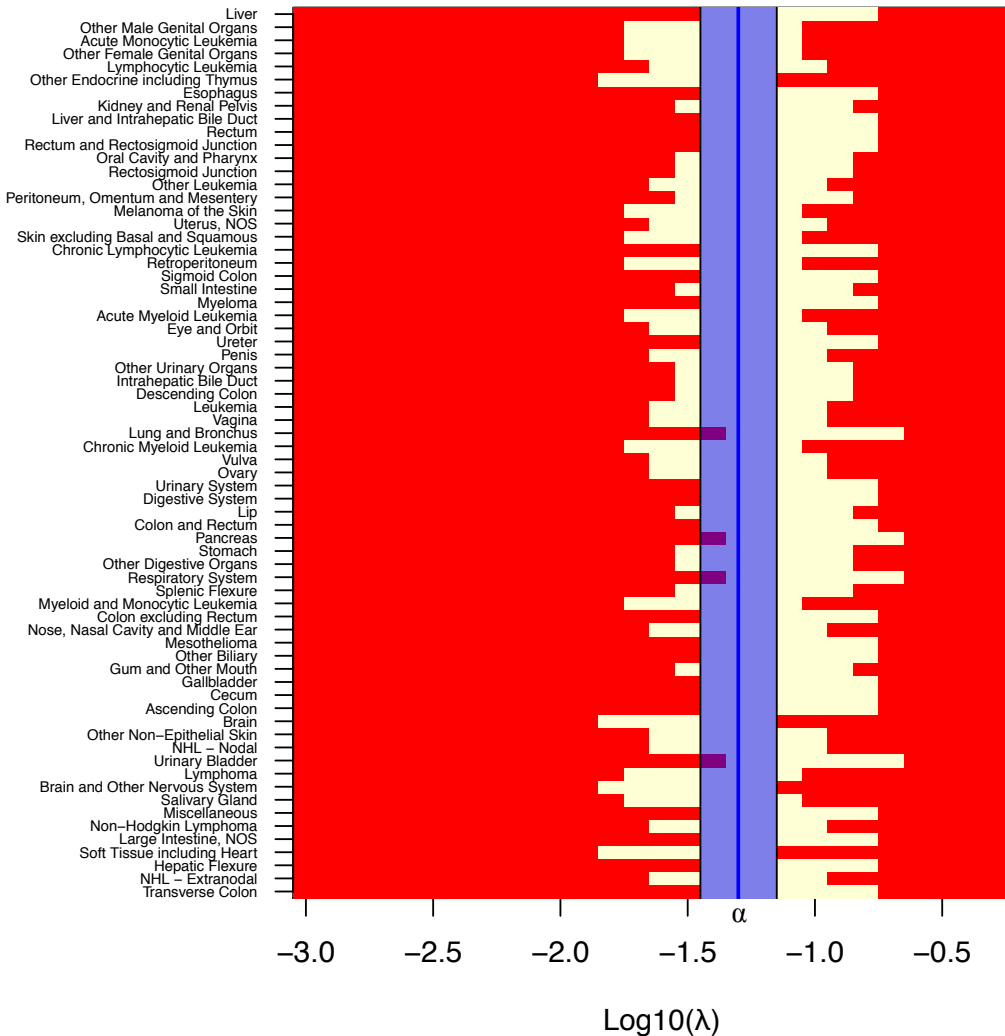

Supplement: pnas.1714478115.sfig02.pdf [file pnas.1714478115.sfig02.pdf]

# Tuberculosis in Cambodia

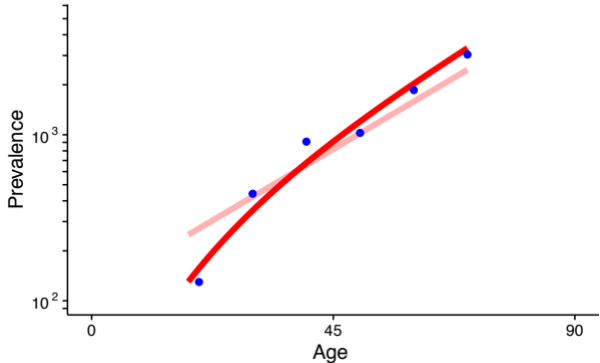

Supplement: pnas.1714478115.sfig04.pdf [file pnas.1714478115.sfig04.pdf]

# T-Lymphoblastic Leukemia

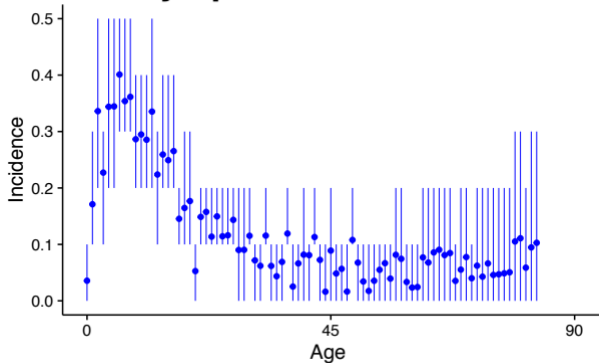

Supplement: pnas.1714478115.sfig05.pdf [file pnas.1714478115.sfig05.pdf]

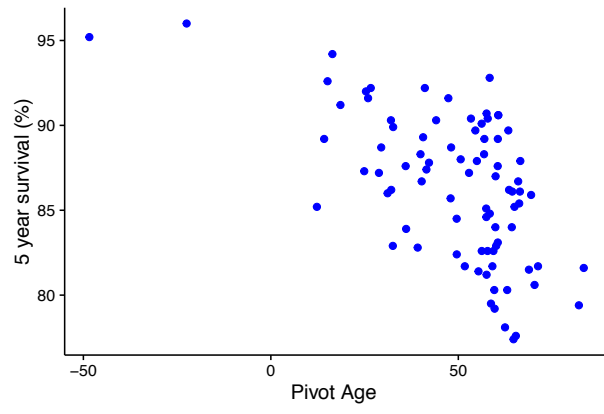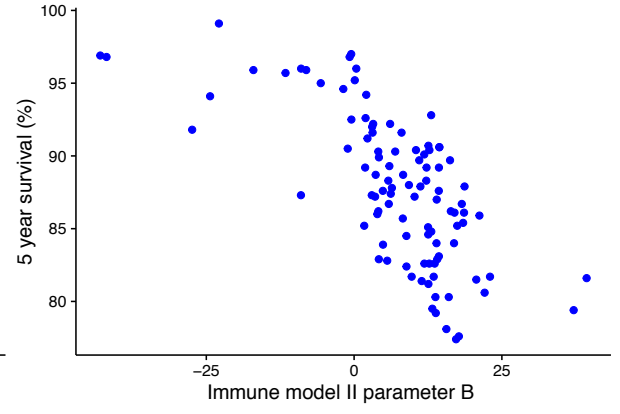

Supplement: pnas.1714478115.sfig07.pdf [file pnas.1714478115.sfig07.pdf]

## Exponential Behaviour

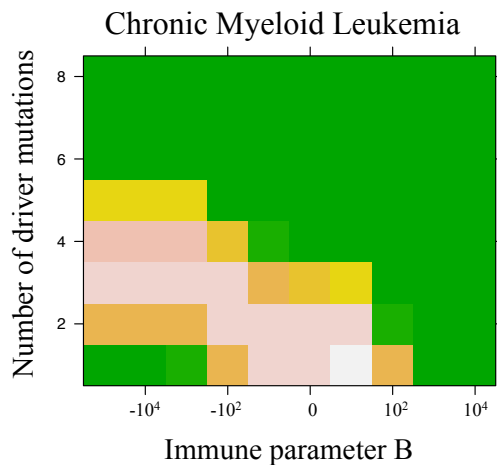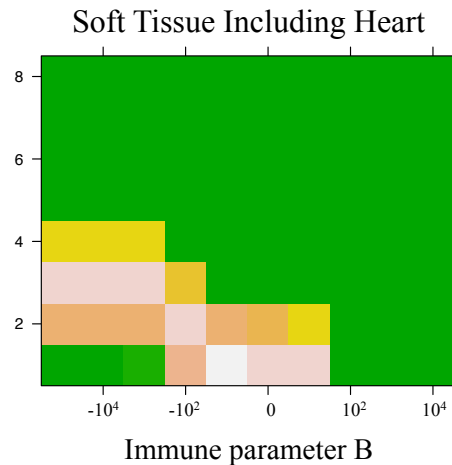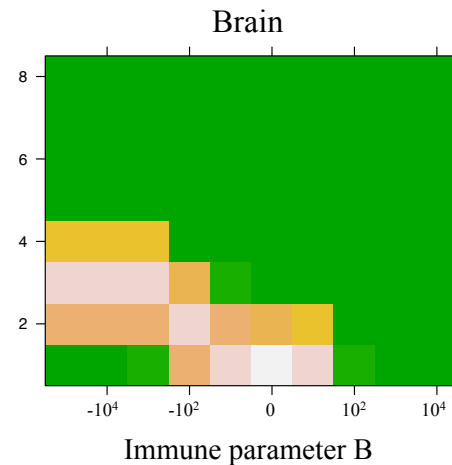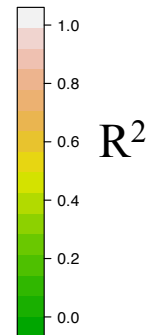

## Power-law Behaviour

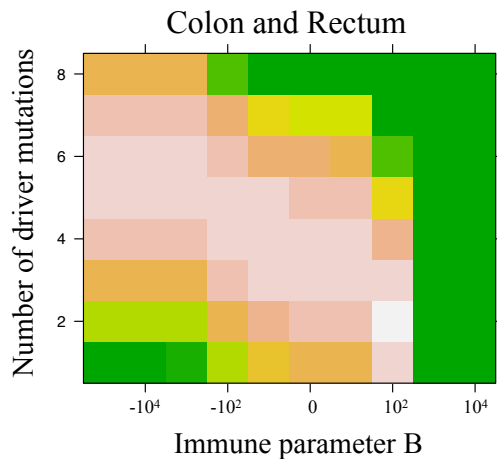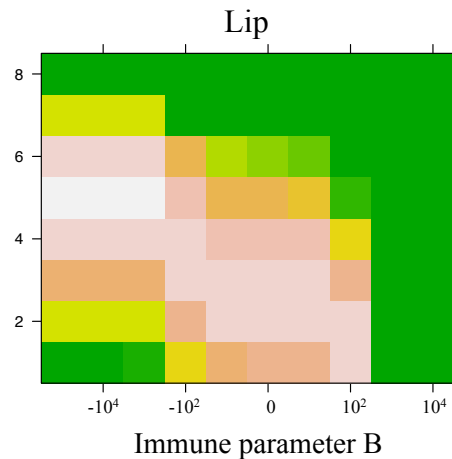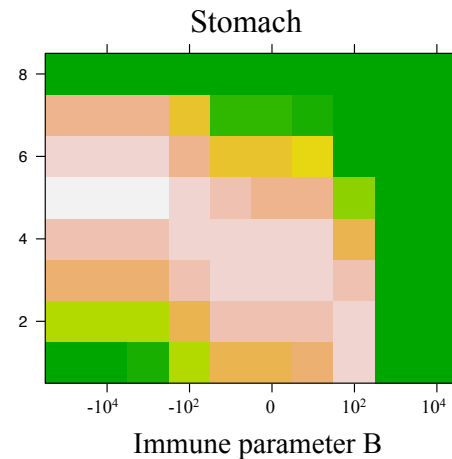

Supplement: pnas.1714478115.sfig08.pdf [file pnas.1714478115.sfig08.pdf]

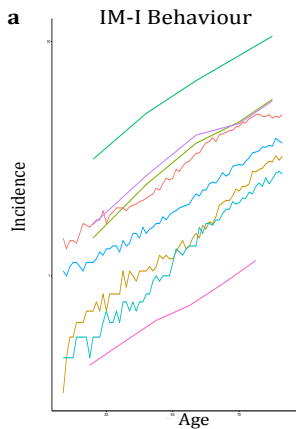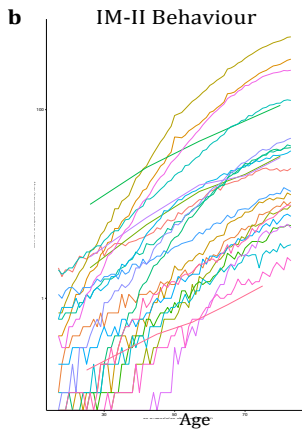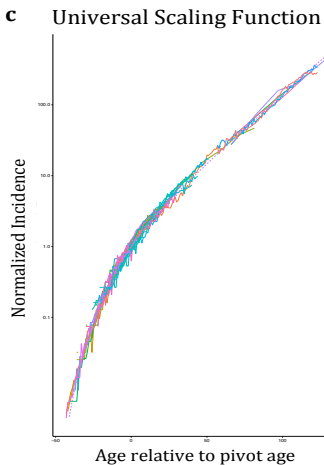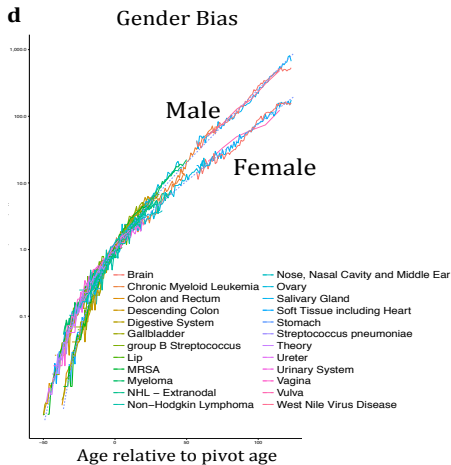

Supplement: pnas.1714478115.sfig09.pdf [file pnas.1714478115.sfig09.pdf]

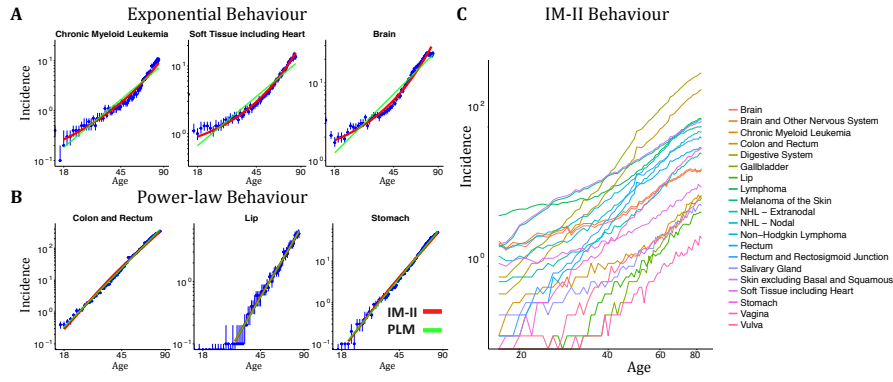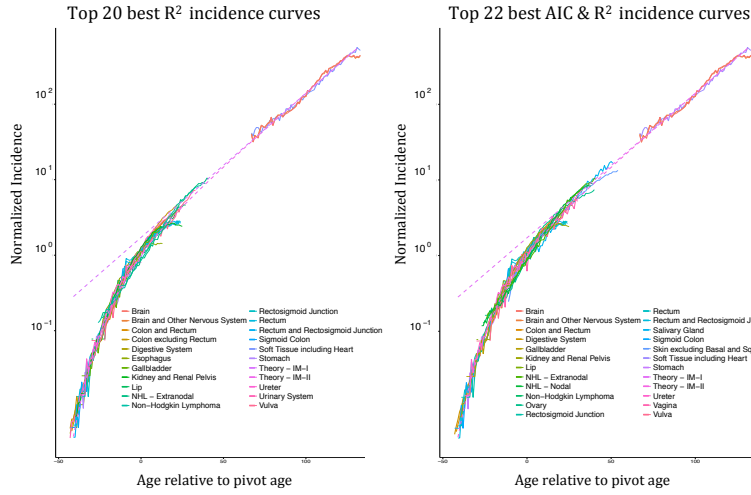

Supplement: pnas.1714478115.sfig10.pdf [file pnas.1714478115.sfig10.pdf]

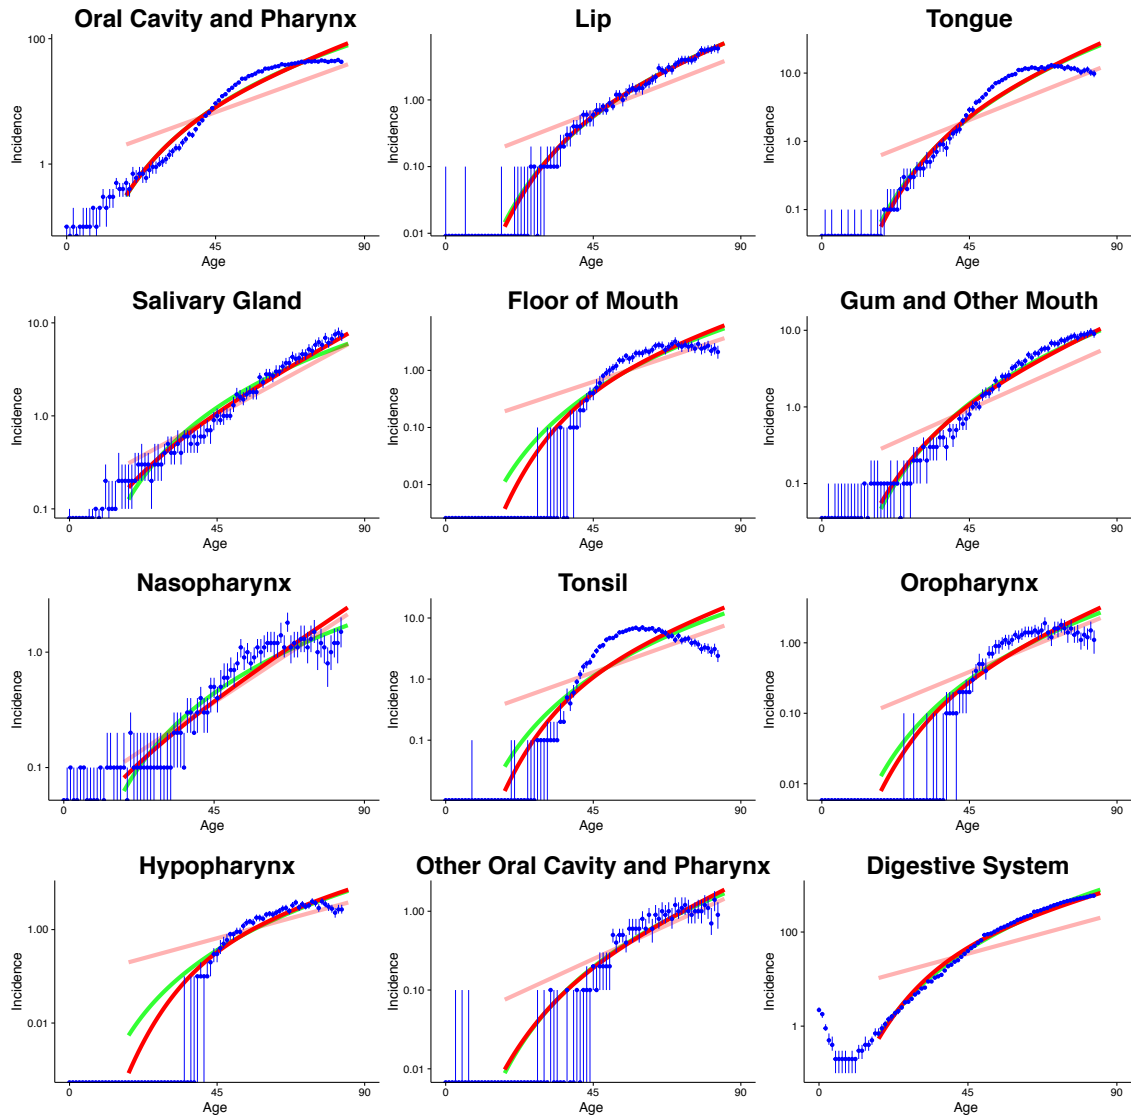

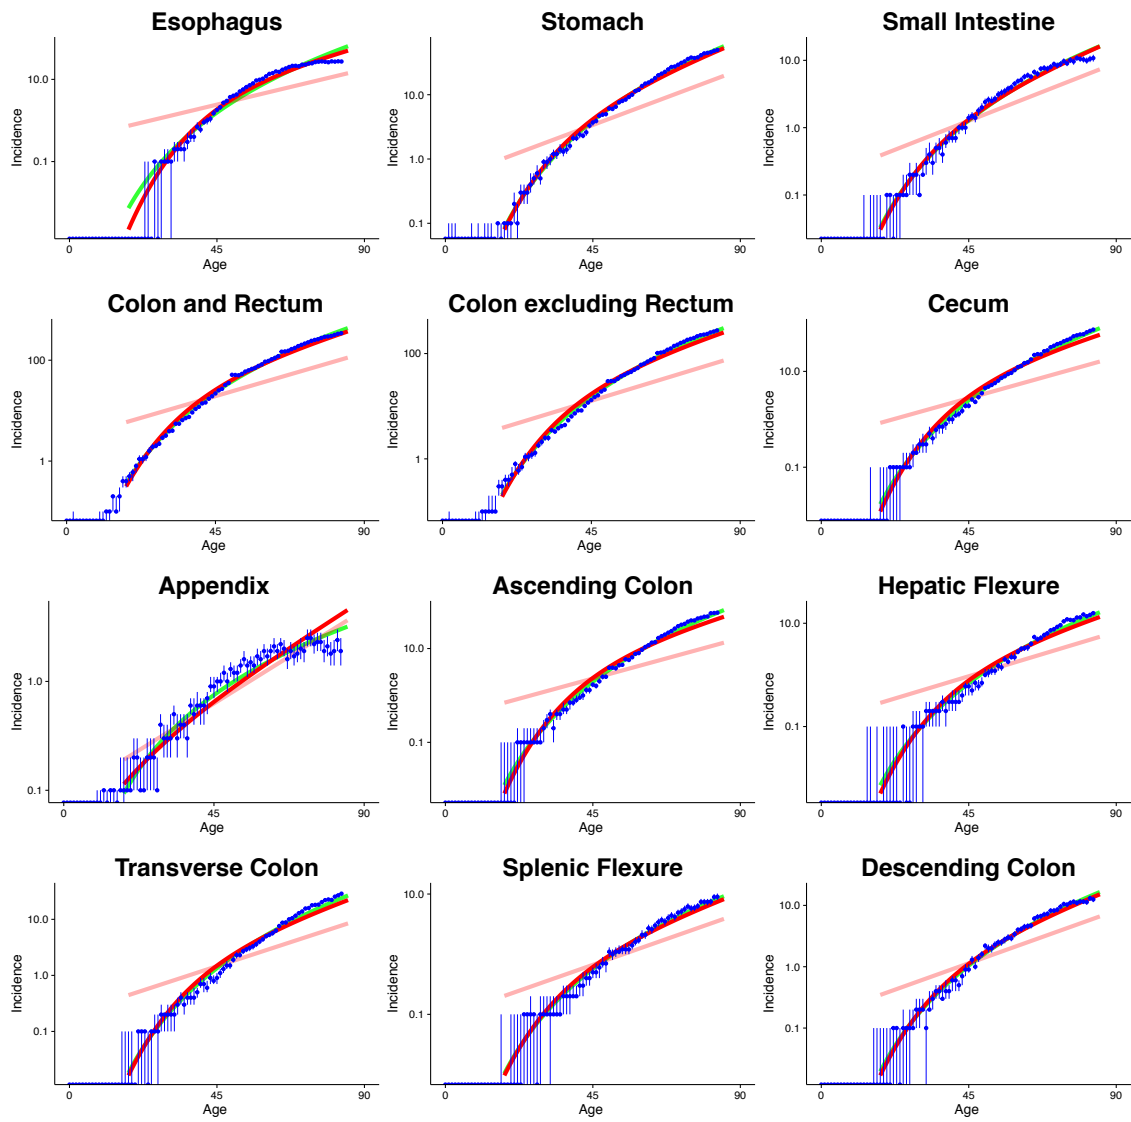

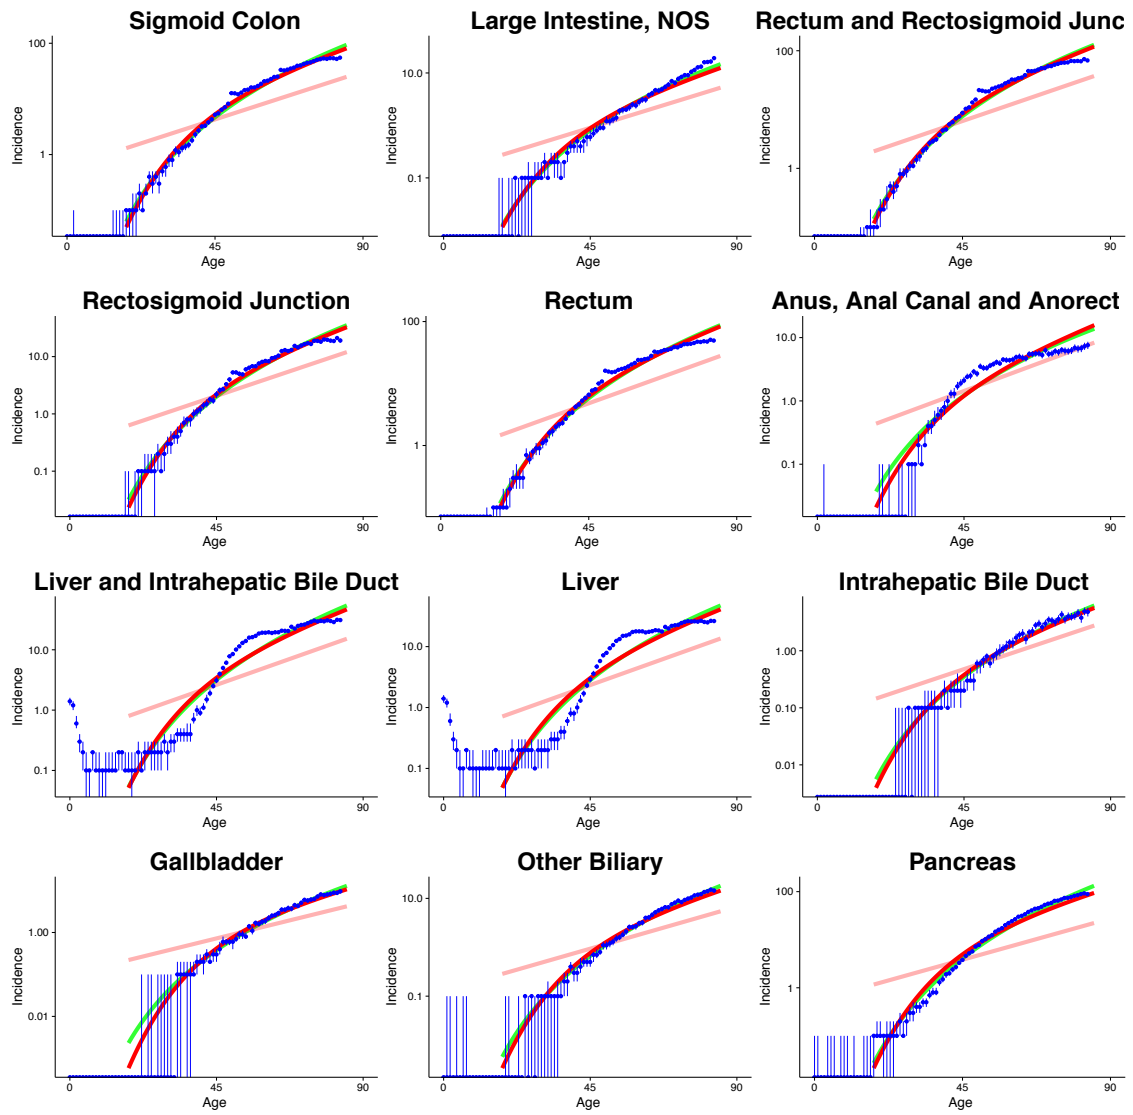

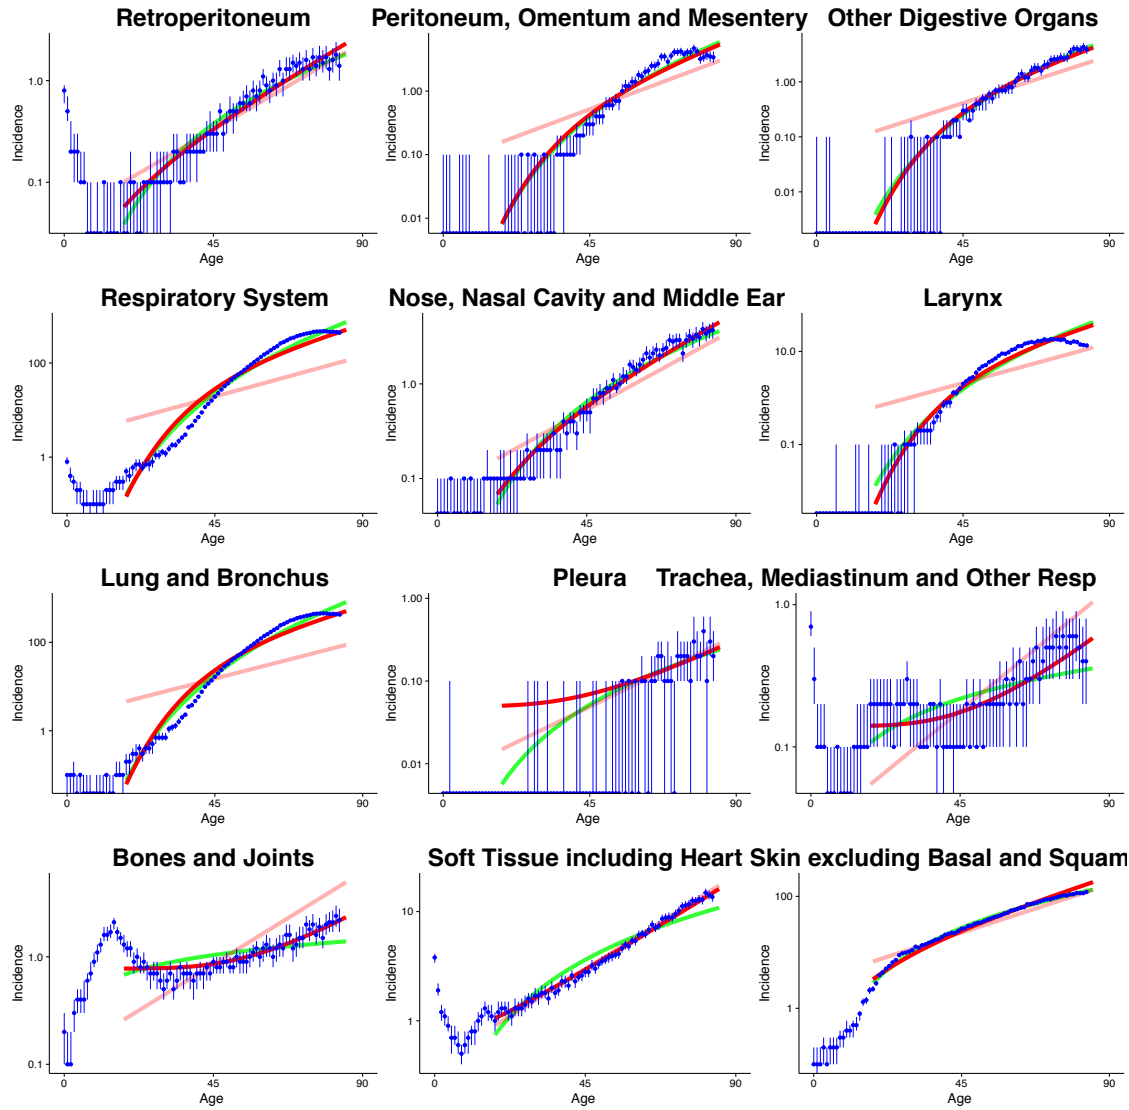

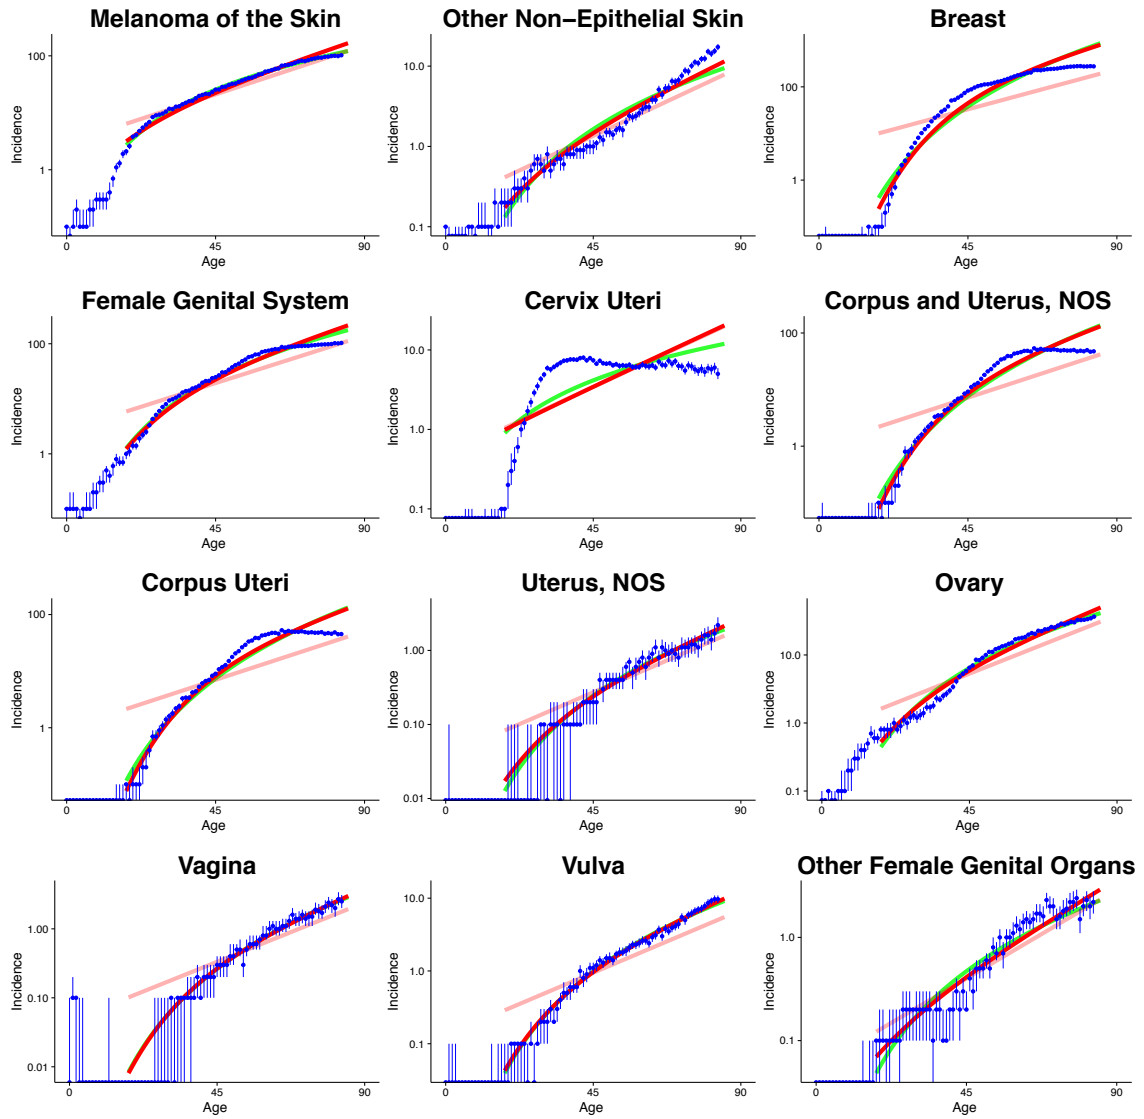

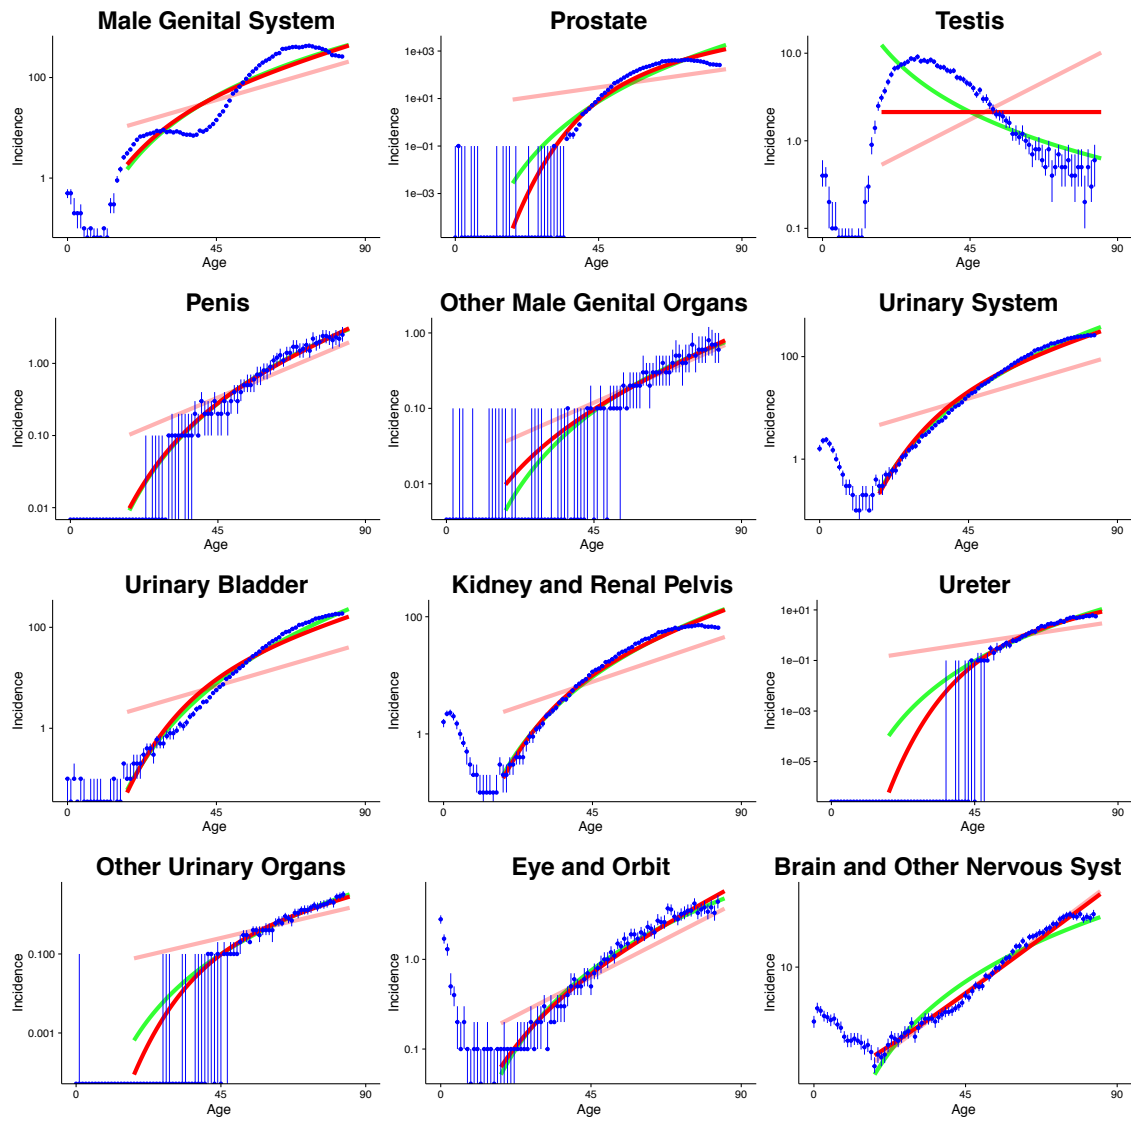

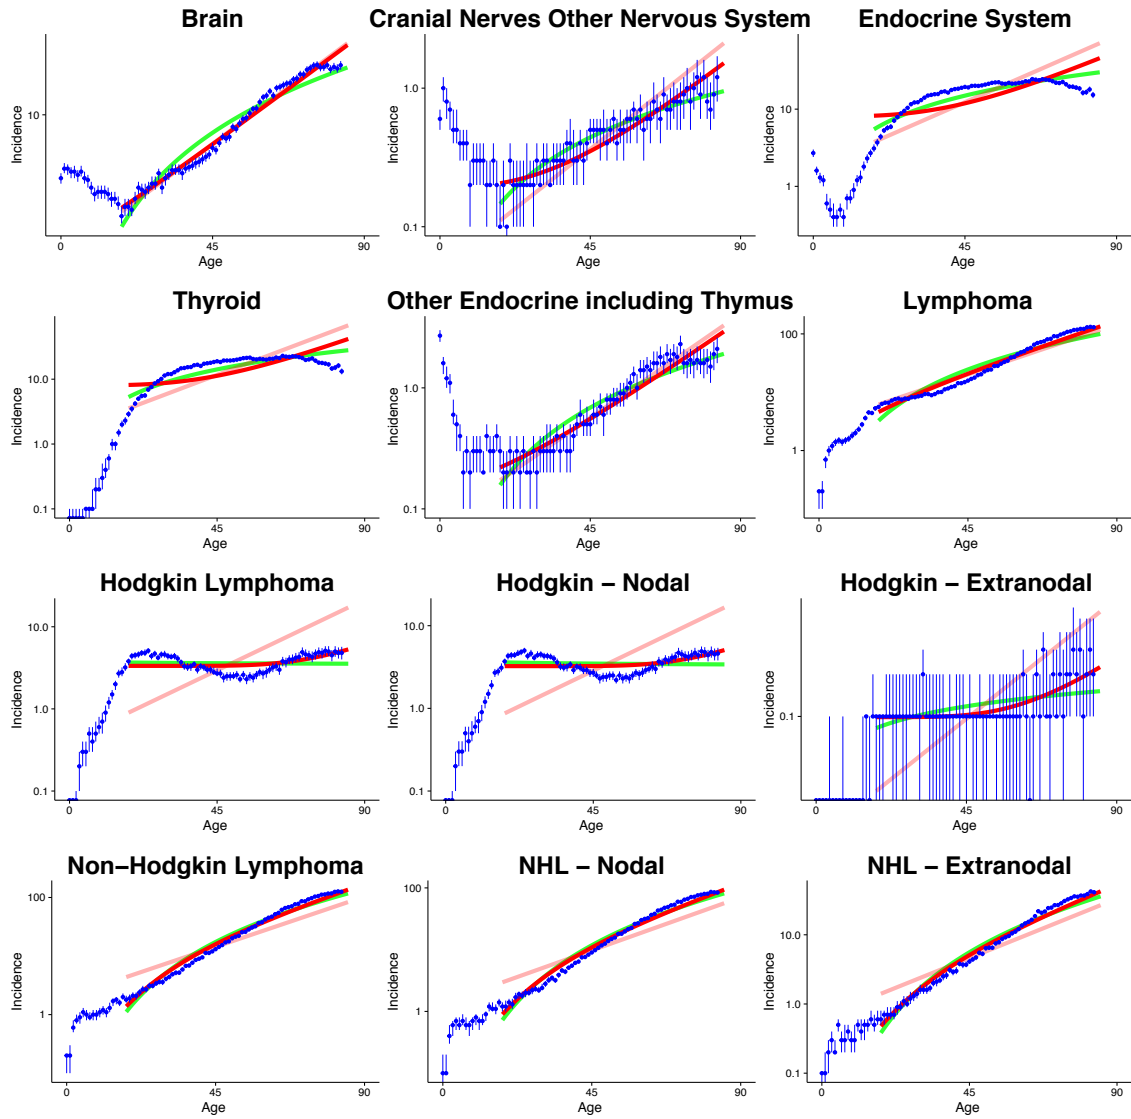

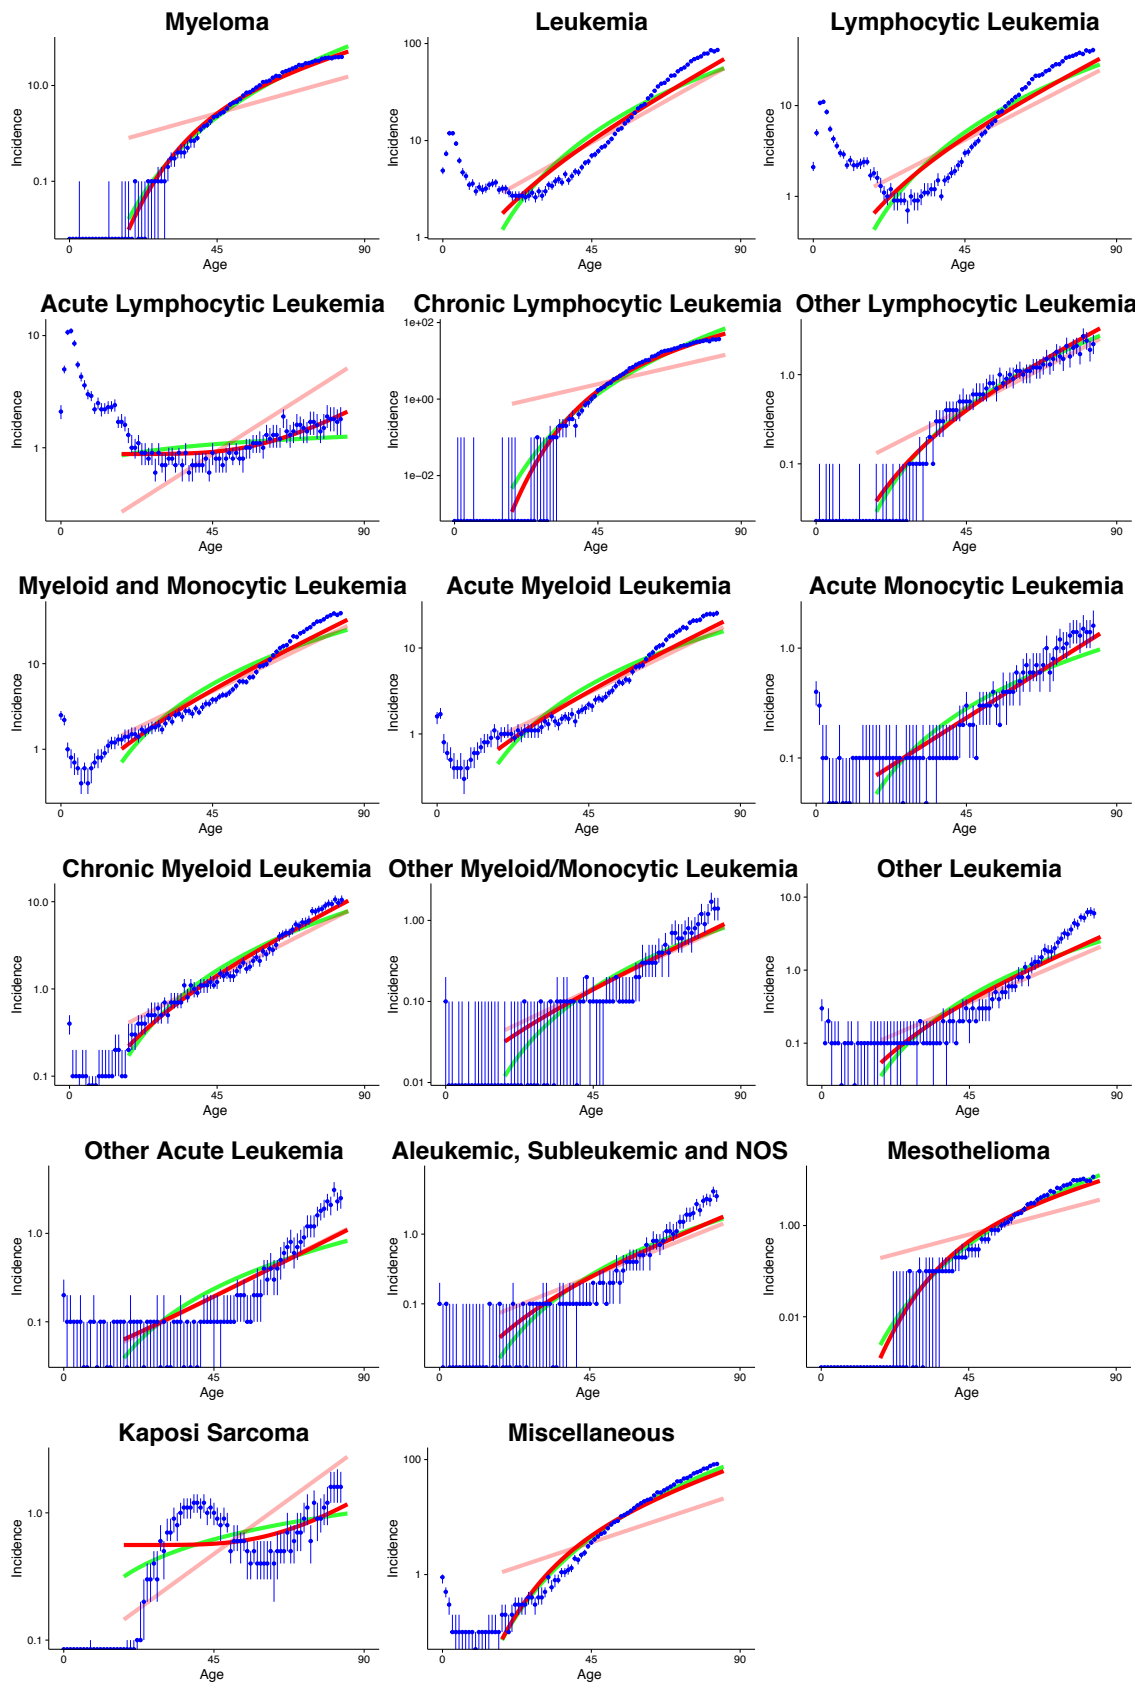

Supplement: pnas.1714478115.sfig11.pdf [file pnas.1714478115.sfig11.pdf]
